# Supplementary material
Source: Springer Nature journal article supplement (https://www.springermedizin.de/resource/supplementary/12916_2013_951_MOESM8_ESM.pdf/9598916)

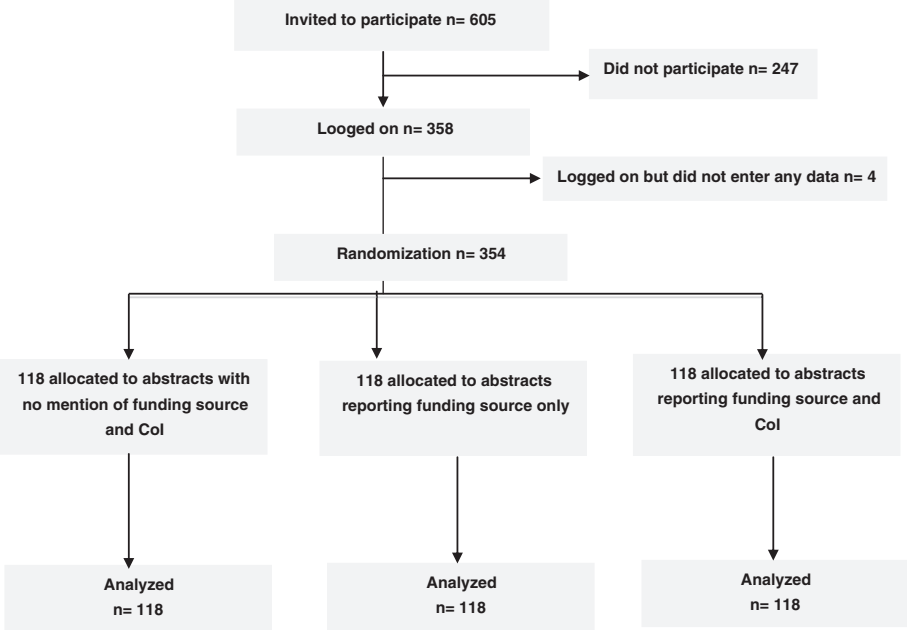

CoI, conflicts of interest

Supplement: MOESM8 [file 9598916]
